# Supplementary material for: s-SHIP expression identifies a subset of murine basal prostate cells as neonatal stem cells
Source: PubMed Central journal article supplement (PMC5045392; doi:10.18632/oncotarget.8709), 2016-04-12
Supplement: oncotarget-07-29228-s001.pdf [file oncotarget-07-29228-s001.pdf]

## s-SHIP expression identifies a subset of murine basal prostate cells as neonatal stem cells

### Supplementary Materials

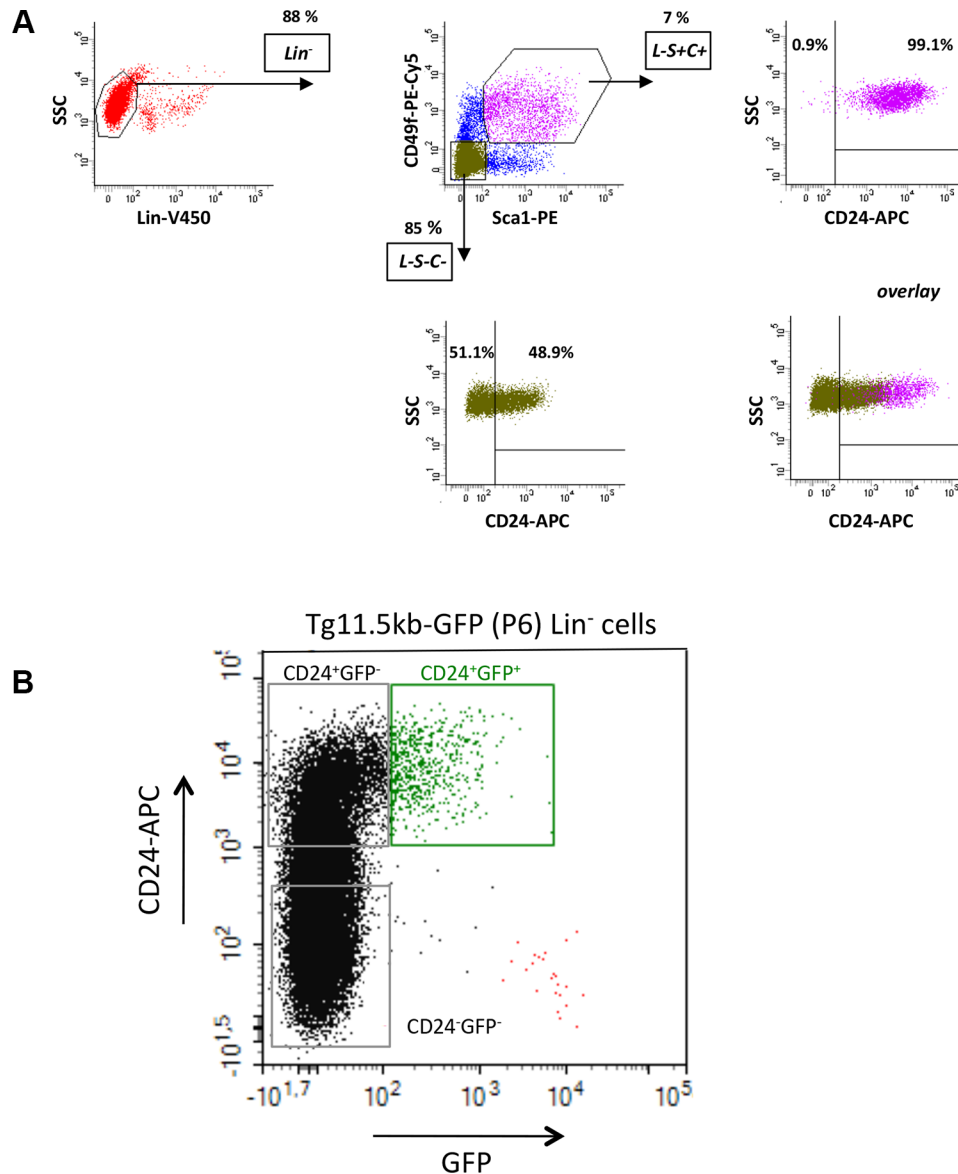

**Supplementary Figure S1:** (A)  $L-S+C^+$  prostate cells from P6 Tg 11.5kb-GFP mice express the  $CD24^+$  prostate epithelial marker. Representative flow cytometry analysis ( $n = 3$ ) of dissociated prostate cells stained for cell lineage markers, Sca-1, CD49f, and CD24; FACS plots show CD24 expression of gated  $L-S+C^+$  cells (upper-right panel) and gated  $L-S-C^-$  cells (lower-middle panel). (B) FACS plot shows gates drawn for cell sorting of  $Lin^- CD24^- GFP^-$ ,  $Lin^- CD24^+ GFP^-$  and  $Lin^- CD24^+ GFP^+$  cell subpopulations. Representative flow cytometry analysis ( $n > 5$ ) of dissociated prostate cells isolated from P6 Tg 11.5kb-GFP mice and stained for cell lineage markers, and CD24. Side-scatter (SSC), phycoerythrin (PE), phycoerythrin-cyanine 5 (PE-Cy5), allophycocyanin (APC).

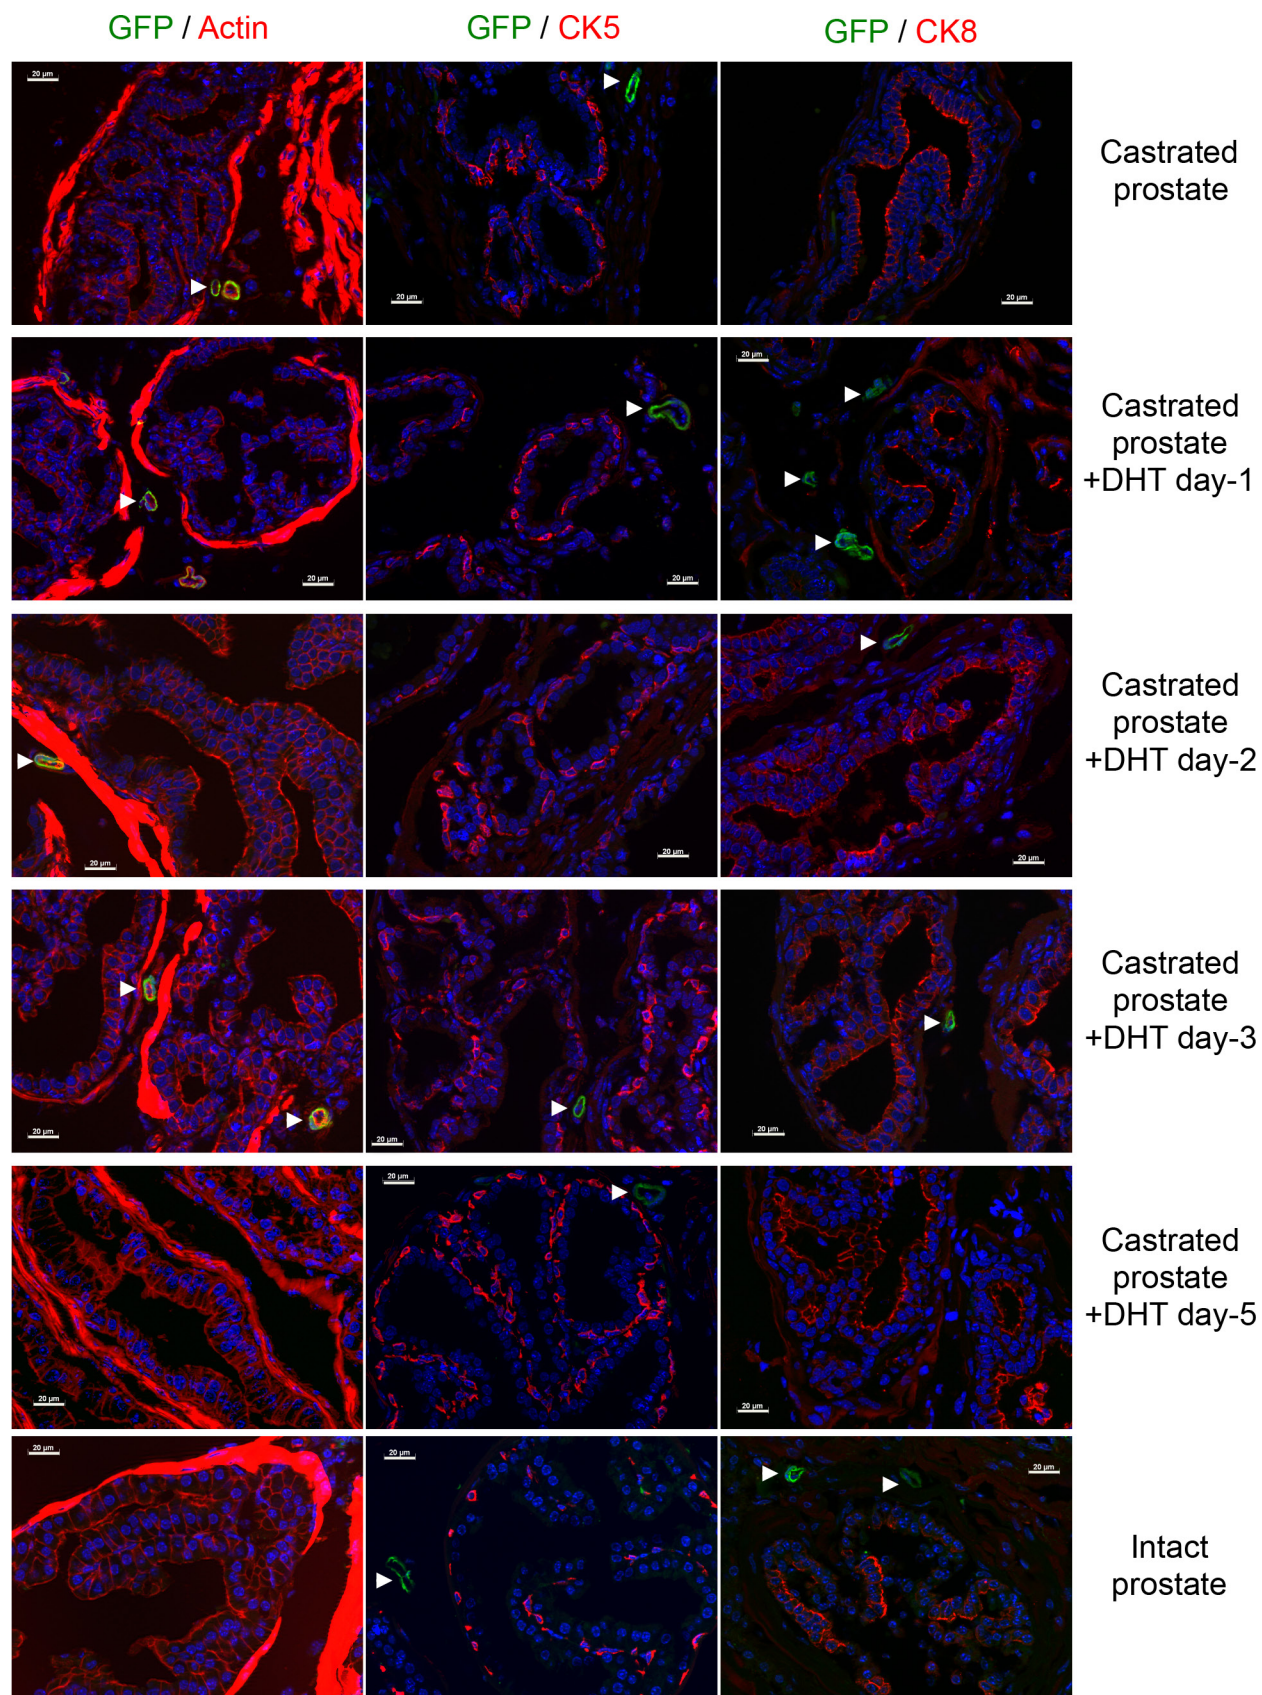

**Supplementary Figure S2: In the regenerated prostate, only GFP<sup>+</sup> vascular smooth muscle cells are detectable.** Representative photographs ( $n = 3$ ) of immunofluorescent staining (red) of prostate tissue frozen sections for actin (left panels), cytokeratin 5 (CK5) basal cell marker (middle panels), and cytokeratin 8 (CK8) luminal cell marker (right panels); GFP<sup>+</sup> cells were only observed around blood vessels (arrowhead). Sections were counterstained with DAPI nuclear stain (blue). Scale bar: 20  $\mu$ m.

## A Prostate cell lines

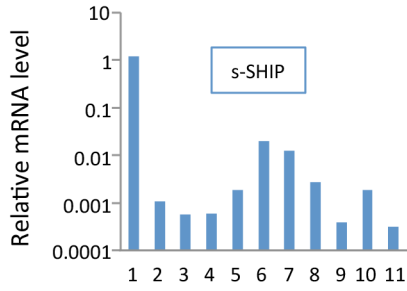

| sample | cell line  |
|--------|------------|
| 1      | RWPE-1     |
| 2      | CWR-22RV1  |
| 3      | DU145      |
| 4      | LAPC4      |
| 5      | LNCaP      |
| 6      | P69        |
| 7      | M12        |
| 8      | MDA-Pca-2b |
| 9      | PC3        |
| 10     | NCI-H660   |
| 11     | V-CaP      |

## LuCaP xenografts

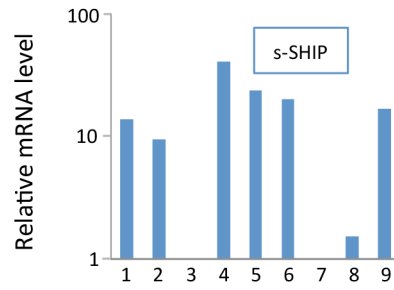

| sample | LuCaP # | Tissue Type            | Androgen status |
|--------|---------|------------------------|-----------------|
| 1      | 23,1    | Lymph node             | dependant       |
| 2      | 23.1AI  | Lymph node             | independent     |
| 3      | 35      | Inguinal Lymph Node    | dependant       |
| 4      | 49      | Omental fat metastasis | independent     |
| 5      | 78      | Peritoneal metastasis  | ND              |
| 6      | 81      | R. Pelvic Lymph Node   | independent     |
| 7      | 86.2    | Bladder metastasis     | independent     |
| 8      | 96      | TURP                   | dependant       |
| 9      | 136     | Acites fluid (cells)   | dependant       |

**B**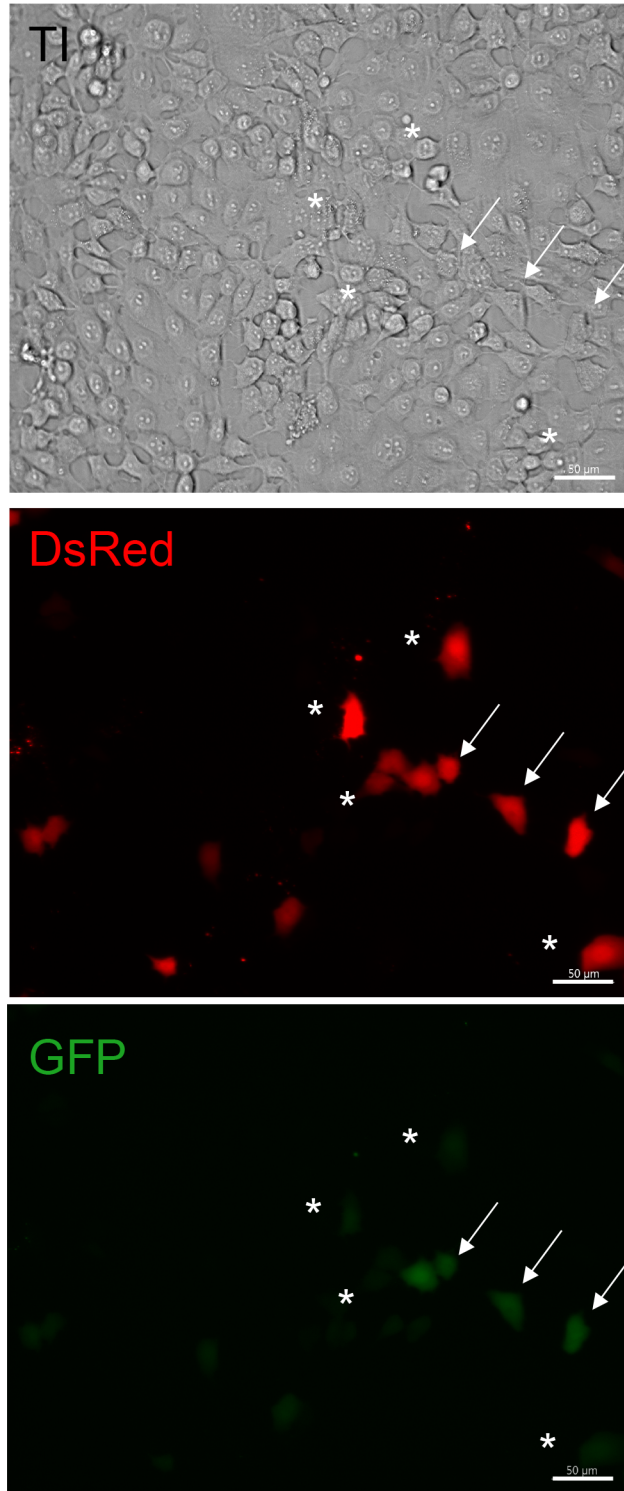

**Supplementary Figure S3:** (A) Human *s*-SHIP mRNA is expressed in various prostate cancer cell lines and xenograft tumors. Quantitative RT-PCR analysis of *s*-SHIP expression using total RNA isolated from 11 prostate cancer cell lines (left) and 9 xenograft tumors (right). The SYBR green method was used and the experimental Ct was calibrated against that of the RPLPO control product. For prostate cell lines, the expression values were adjusted by setting the *s*-SHIP relative expression of RWPE-1 cells to be 1. Data are representative of two independent experiments. LuCaP xenografts are from different tumors that have been propagated in immunocompromised mice. 23.1AI is the androgen insensitive variant of 23.1 that survived after the mouse has been castrated. (B) Heterogeneity of *s*-SHIP promoter expression of prostate cancer cells. M12 prostate cancer cells were transfected with a plasmid containing both *s*-SHIP-GFP promoter reporter and CMV promoter-DsRed. CMV-DsRed was obtained as a PCR fragment of pDsRed-monomer-N1 (Clontech), and inserted at the NotI site of pBSK-11.5-kb-GFP plasmid [26]. Heterogeneity of GFP/*s*-SHIP expression was observed in the transfected DsRed- expressing cell population, with DsRed<sup>+</sup>GFP<sup>-</sup> (asterisks) and DsRed<sup>+</sup>GFP<sup>+</sup> (arrows) cells. Scale bars : 50 µm.

## Supplementary Material List

### Liste 1 : Primers used for RT-qPCR

**LEF1** : forward : 5'-CGAGACAATTATGGCAAGAAGAAG-3' ; reverse : 5'- GCTTCTCTTACCACCATGTTTCAG-3'

**ROR1** : forward : 5'- CATAACAAGCCCAAGAGCAAG-3' ; reverse : 5'- GGCCCTTATAGATTTTTCCAAAG-3'

**WNT10B** : forward : 5'-GCAAGCTGGTGGTAACGG-3' ; reverse : 5'- CTCAGTGCTGCCCCGATG-3'
